# Supplementary material for: Highly selective uptake of Ba2+and Sr2+ions by graphene oxide from mixtures of IIA elements
Source: Royal Society of Chemistry journal article supplement (doi:10.1039/c4ra02640c), 2014-01-01
Supplement: c4ra02640c1.pdf [file c4ra02640c1.pdf]

The morphology of G-IIA samples was studied by SEM and shown in Figure S1 at magnification of 3,000× and 40,000× and their EDX for absorbed metal ions. According to the SEM images, all materials showed a typical exfoliated structure in agreement with previous studies. The elemental map obtained from EDX shows a trend of absorbed metal, which is downwards in the group IIA metals (from Mg<sup>2+</sup>, via Ca<sup>2+</sup> and Sr<sup>2+</sup> to Ba<sup>2+</sup>) in periodic table, the metal element can be absorbed increasingly.

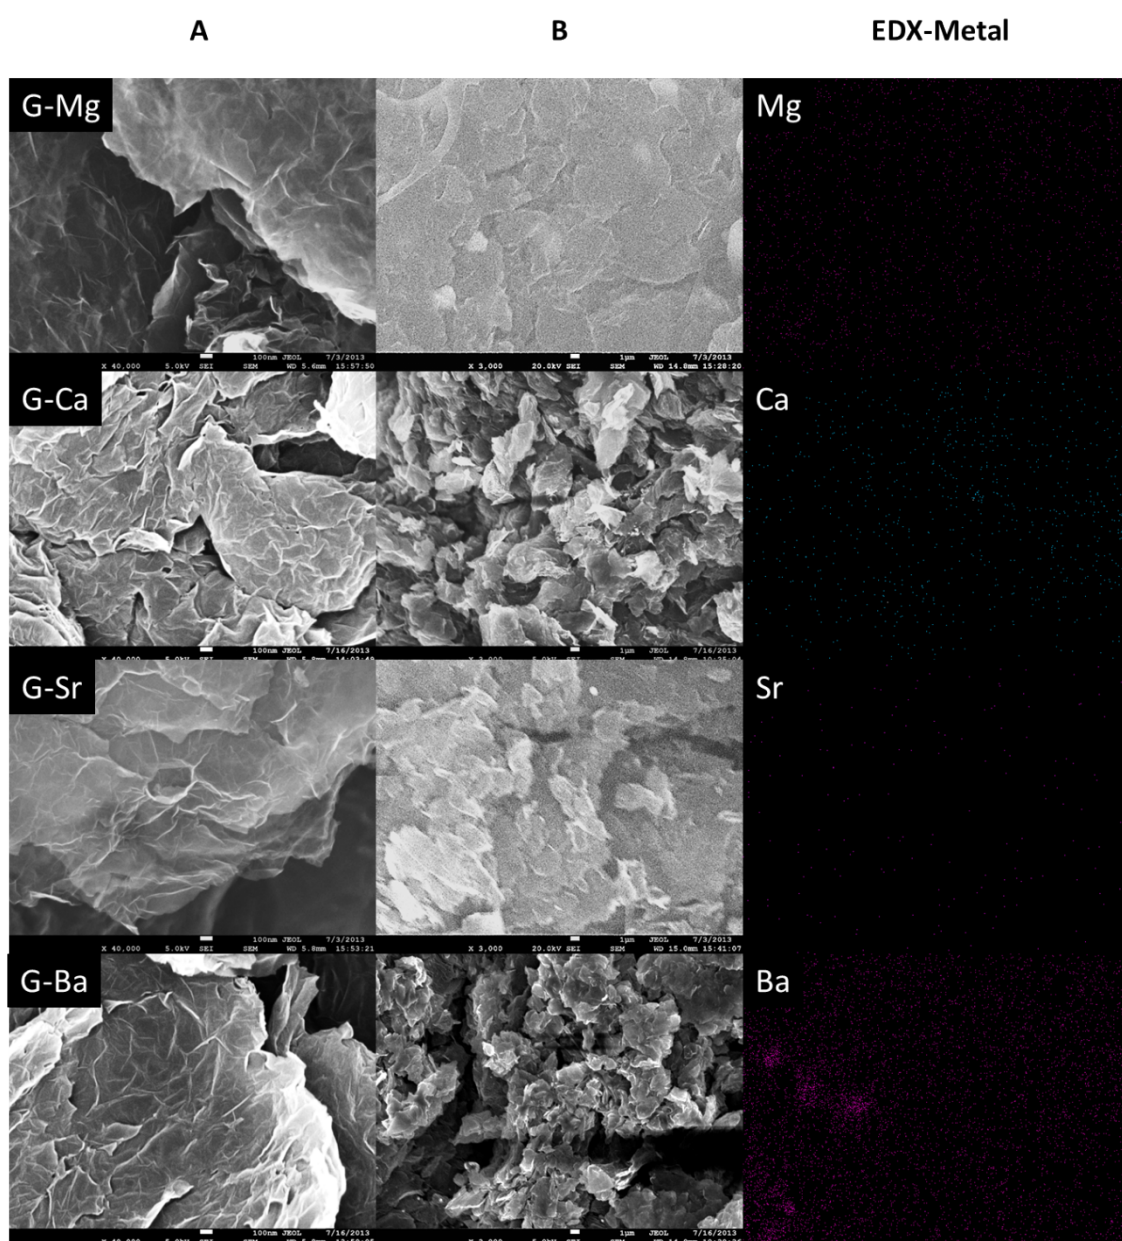

**Figure S1.** Scanning electron micrographs of G-Mg, G-Ca, G-Sr and G-Br at magnification of (A) 40,000×, (B) 3,000×, and (C) their EDX for absorbed metals. Scale bar of 100 nm and 1 μm.
